# Supplementary material
Source: publisher site journal article supplement (https://www.degruyterbrill.com/publication/isbn/9783110808032/downloadAsset/9783110808032_Inhaltsverzeichnis.pdf)
Supplement: Supplementary file 1 [file 9783110808032_Inhaltsverzeichnis.pdf]

## Inhaltsverzeichnis

|                                                                                 |    |
|---------------------------------------------------------------------------------|----|
| Vor-Geschichte.....                                                             | 7  |
| I. Einleitung: Der sozialwissenschaftliche Zugang zur Religion .....            | 7  |
| 1. Der Begriff der Religion .....                                               | 8  |
| 2. Alltagswissen und wissenschaftliches Verständnis der Religion .....          | 10 |
| 3. Methodologischer Agnostizismus .....                                         | 14 |
| 4. Zu Aufbau und Inhalt .....                                                   | 16 |
| II. Die Geburt der Religionssoziologie aus dem Geiste der Religionskritik ..... | 20 |
| 1. Säkularisierung, externe und immanente Religionskritik .....                 | 20 |
| 2. Die Kritik der Religion .....                                                | 22 |
| 3. Von der Kritik zur wissenschaftlichen Erklärung der Religion.....            | 32 |
| 4. Religionswissenschaft und Religionssoziologie ....                           | 35 |
| Die klassische Phase der Religionssoziologie .....                              | 39 |
| III. Max Weber und die Religion in der abendländischen Entwicklung .....        | 39 |
| 1. Die protestantische Ethik und der Geist des Kapitalismus .....               | 40 |
| 2. Zum Wechselverhältnis von Wirtschaft und Religion in der Gesellschaft .....  | 44 |
| 3. Religiöses und magisches Handeln .....                                       | 51 |
| IV. Durkheims ‚heilige Gesellschaft‘ und die Anthropologie der Religion .....   | 58 |
| 1. Die elementaren Formen des religiösen Lebens ....                            | 59 |
| 2. Religion als ‚transzendenter Ort der Gruppenkräfte‘ .....                    | 65 |
| 3. Funktion und Wandel der Religion .....                                       | 68 |
| 4. Von Durkheim zur Anthropologie der Religion.....                             | 71 |

|                                                                                                                |     |
|----------------------------------------------------------------------------------------------------------------|-----|
| Von der Soziologie der Kirchen zur Zivilreligion .....                                                         | 81  |
| V. Die soziologische Erforschung der Kirchlichkeit .....                                                       | 81  |
| 1. Zur Entwicklung der Kirchensoziologie .....                                                                 | 82  |
| 2. Kirchensoziologische Forschung .....                                                                        | 84  |
| 3. Kirchlichkeit in Deutschland und Europa .....                                                               | 86  |
| 4. Zur Methode der Kirchensoziologie .....                                                                     | 92  |
| VI. Die religiöse Integration der Gesellschaft und die<br>Zivilreligion .....                                  | 95  |
| 1. Soziale Strukturen und Funktionen .....                                                                     | 96  |
| 2. Funktionen der Religion .....                                                                               | 98  |
| 3. Die Evolution der Religion .....                                                                            | 102 |
| 4. Funktionale Äquivalente und die Zivilreligion .....                                                         | 105 |
| Neoklassische Religionssoziologie .....                                                                        | 109 |
| VII. Heiliger Kosmos und unsichtbare Religion:<br>Substantiale und funktionale Definitionen der Religion ..... | 109 |
| 1. Die gesellschaftliche Konstruktion der Wirklichkeit .....                                                   | 110 |
| 2. Funktionale und substantiale Definitionen der<br>Religion .....                                             | 114 |
| 3. Peter L. Berger und die Signale der Transzendenz ..                                                         | 117 |
| 4. Pluralisierung, Privatisierung und Säkularisierung ..                                                       | 120 |
| 5. Thomas Luckmanns unsichtbare Religion .....                                                                 | 123 |
| VIII. Religion als System und das Erbe der Religionskritik ..                                                  | 128 |
| 1. Die Differenzierung der Gesellschaft und die<br>religiöse Kommunikation .....                               | 129 |
| 2. Die Funktion, die Leistung und die Reflexion der<br>Religion .....                                          | 132 |
| 3. Die Organisation der Religion und die Inklusion ...                                                         | 135 |
| 4. Das Erbe der Religionskritik – die kritische Theorie<br>der Religion .....                                  | 138 |
| Bestand und Entwicklung gegenwärtiger Religiosität .....                                                       | 145 |
| IX. Kirchen, Sekten und die Organisation der Religion ....                                                     | 145 |
| 1. Typologie religiöser Gemeinschaften .....                                                                   | 146 |
| 2. Religiöse Organisationen .....                                                                              | 149 |

|                                                                                     |     |
|-------------------------------------------------------------------------------------|-----|
| Inhaltsverzeichnis                                                                  | 5   |
| 3. Religiöse Gemeinschaften im deutschsprachigen Raum .....                         | 153 |
| X. New Age, Fundamentalismus und Volksfrömmigkeit ..                                | 170 |
| 1. Fundamentalismus .....                                                           | 172 |
| 2. Esoterik und der New Age-Komplex .....                                           | 178 |
| 3. Populäre Religiosität .....                                                      | 186 |
| XI. Religiöse Erfahrung, Konversion und Individualisierung .....                    | 189 |
| 1. Religiöse Erfahrungen .....                                                      | 190 |
| 2. Konversion und Kommunikation .....                                               | 193 |
| 3. Beichte, Biographie und die Individualisierungsthese .....                       | 199 |
| XII. Medien, Märkte und die Zukunft der Religion(ssoziologie) .....                 | 202 |
| 1. Mündlichkeit, Medienreligiosität und die „Electronic Church“ .....               | 202 |
| 2. Vom Marktmodell der Religion zum ‚neuen Paradigma‘ der Religionssoziologie ..... | 206 |
| 3. Das religiöse Feld .....                                                         | 212 |
| 4. Globalisierung und die Zukunft der Religion(ssoziologie) .....                   | 216 |
| Literatur .....                                                                     | 221 |
| Glossar .....                                                                       | 232 |
| Personen- und Sachregister .....                                                    | 245 |
